# Supplementary material for: Time-dependent AC magnetometry and chain formation in magnetite: the influence of particle size, initial temperature and the shortening of the relaxation time by the applied field
Source: Royal Society of Chemistry journal article supplement (doi:10.1039/d1na00463h), 2021-01-01
Supplement: d1na00463h1.pdf [file d1na00463h1.pdf]

Electronic Supplementary Material (ESI) for Nanoscale Advances.

## SUPPLEMENTARY INFORMATION: Time-dependent AC magnetometry and chain formation in magnetite: the influence of particle size, initial temperature and the shortening of the relaxation time by the applied field.

Irene Morales,<sup>a</sup> Rocio Costo,<sup>b</sup> Nicolas Mille,<sup>c</sup> Julian Carrey,<sup>c</sup> Antonio Hernando,<sup>a,d,e</sup>  
and Patricia de la Presa<sup>\*,a,d</sup>

<sup>a</sup>Instituto de Magnetismo Aplicado (UCM-ADIF-CSIC), P.O. Box 155, Las Rozas, Madrid 28230, Spain.

<sup>b</sup>Instituto de Ciencia de Materiales de Madrid/CSIC, Sor Juana Inés de la Cruz 3, Madrid 28049, Spain

<sup>c</sup>Universit  de Toulouse, INSA, UPS, Laboratoire de Physique et Chimie des Nano-Objets (LPCNO), 135 Avenue de Rangueil, F-31077 Toulouse, France and CNRS, UMR 5215, LPCNO, F-31077 Toulouse, France.

<sup>d</sup>Departamento de F sica de Materiales, Universidad Complutense de Madrid, Madrid 28048, Spain.

<sup>e</sup>Donostia International Physics Center, 20018, Donostia, Gipuzkoa; IMDEA Nanociencia, 28049, Madrid; Universidad de Nebrija, 28015, Madrid, Spain

\* Corresponding author: pmpresa@ucm.es

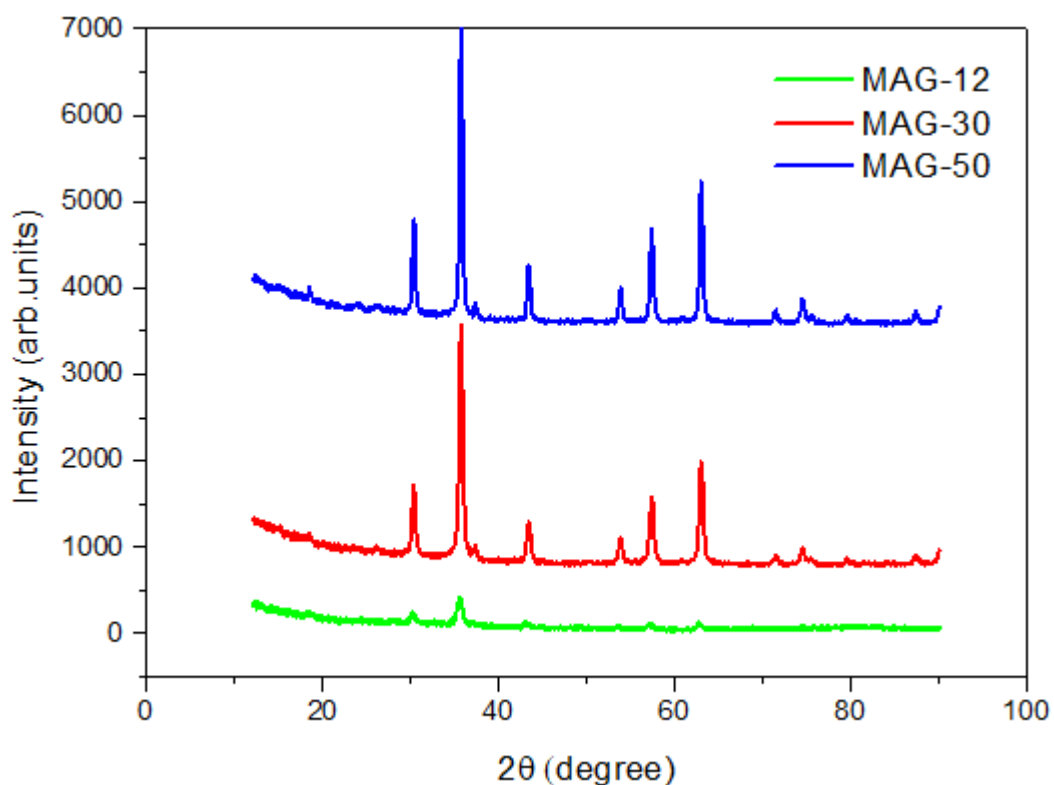

Fig. S1. XRD patterns of samples MAG-12, MAG-30 and MAG-50.

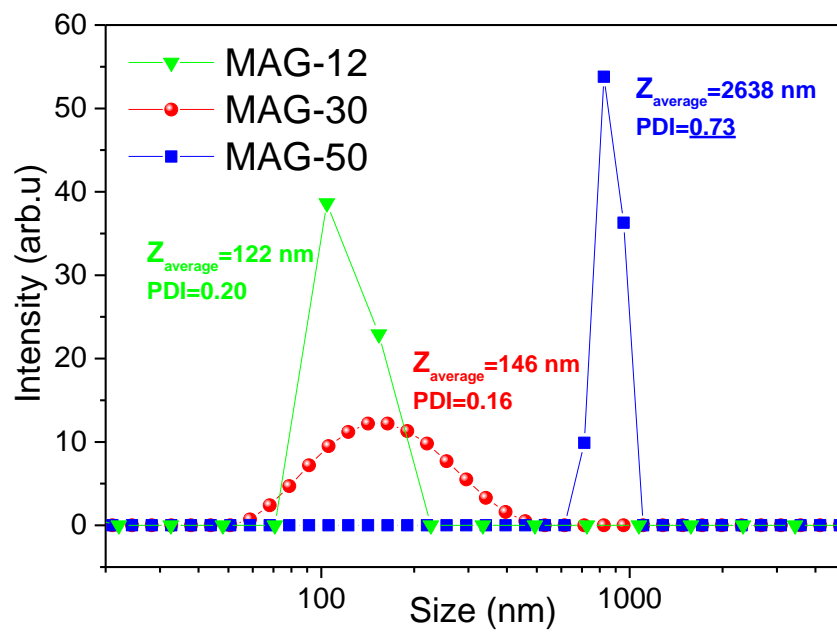

Fig.S2. DLS Intensity measurements.

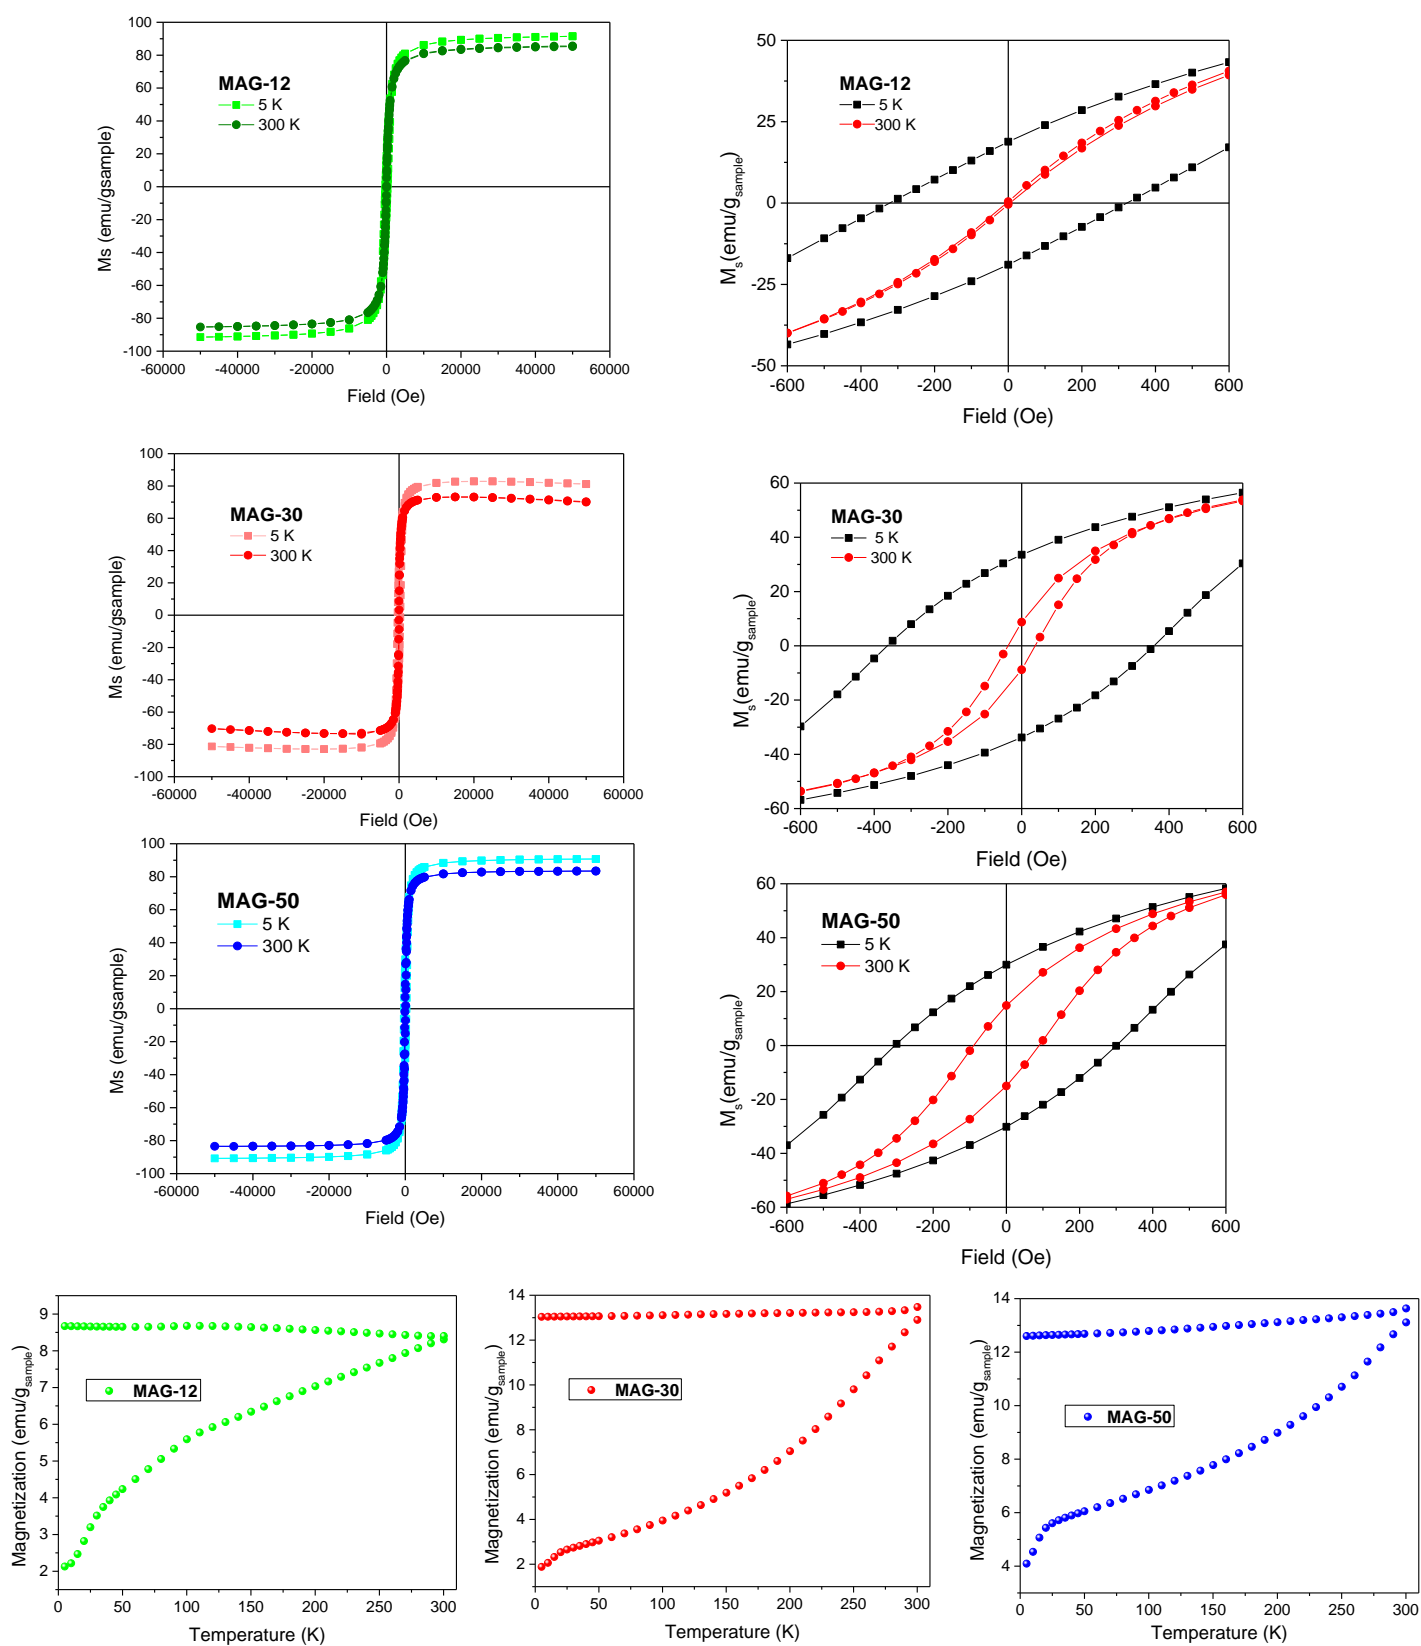

Fig.S3. SQUID measurements (HC and ZFCFC at 100 Oe) of the samples in powder.

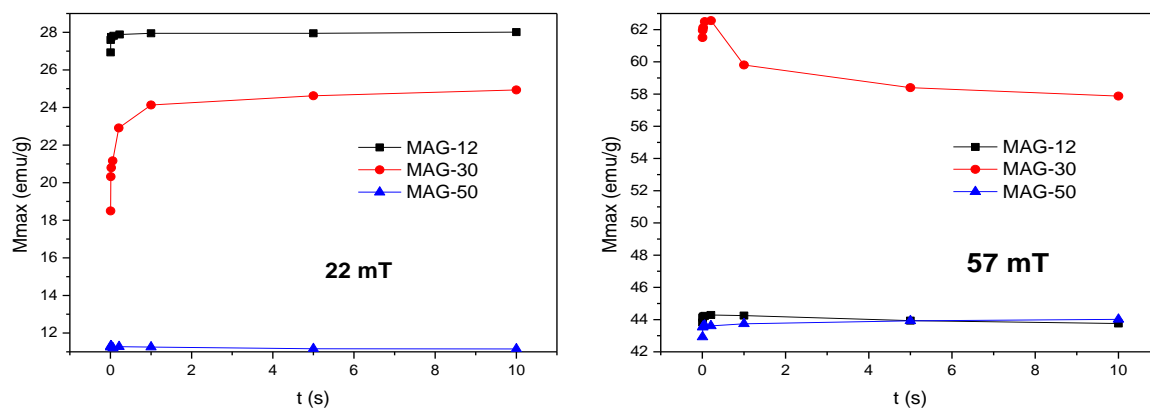

Fig. S4. Evolution of the maximum magnetization as a function of the measurement time for applied fields of 22 mT and 57 mT.

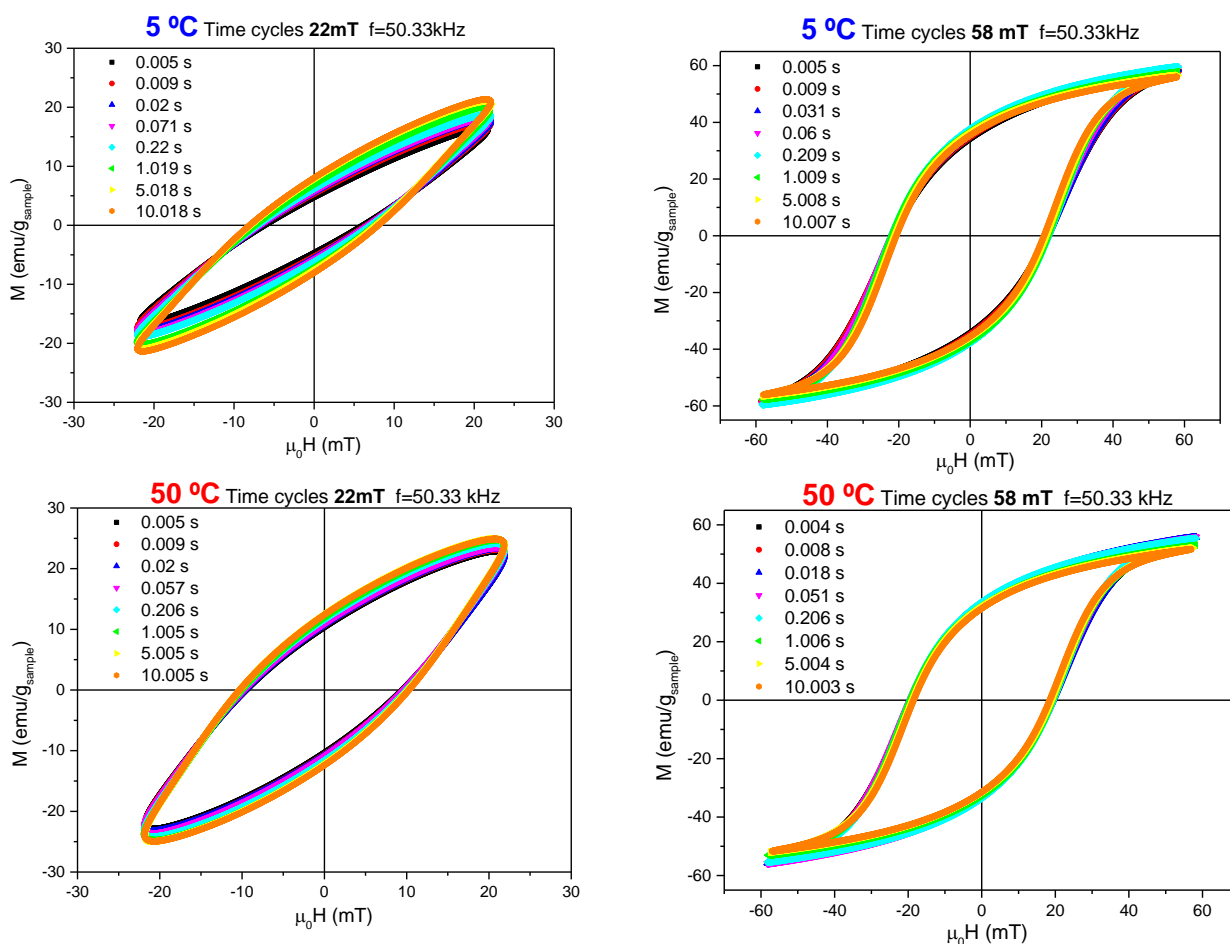

Fig. S5. Evolution of the hysteresis cycles as a function of the measurement time for sample MAG-30 at two different initial temperatures at 22 mT and 58 mT.

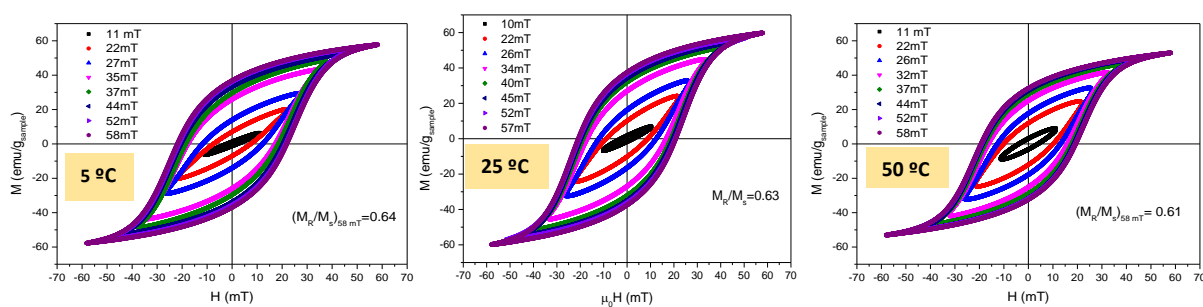

Figure S6. Evolution of MAG-30 high frequency hysteresis loops as a function of the field for different initial temperatures (5, 25 and 50 °C).  $t_{\text{meas}}=1$  s. Frequency: 50.33 kHz.

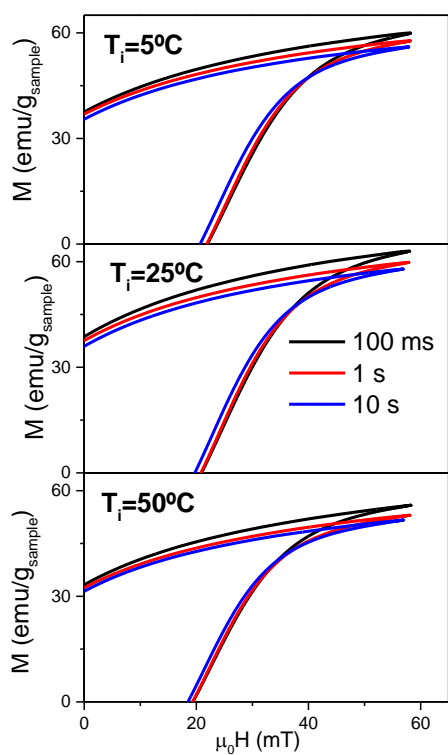

Fig. S7. Hysteresis cycles at 57 mT at three different initial temperatures and measured at different measurement times.

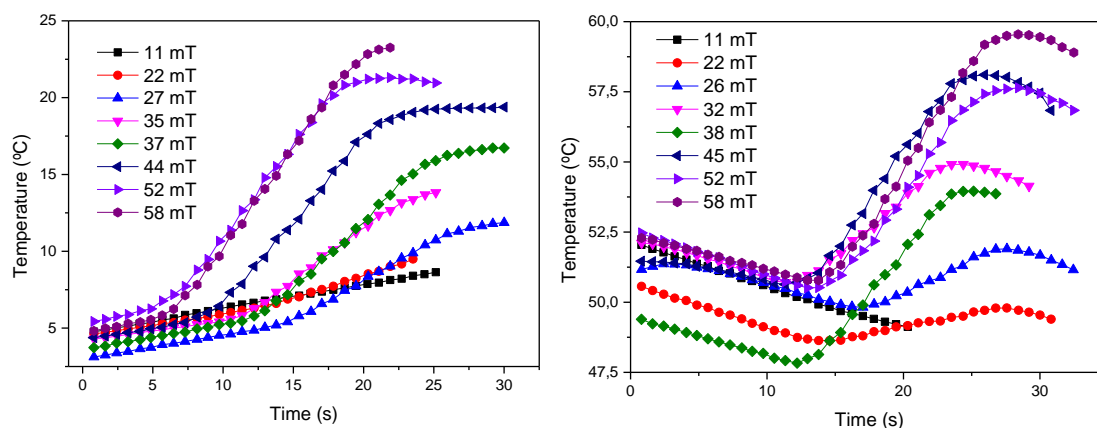

Fig. S8. Temperature curves recorded simultaneously with the AC loops for sample MAG-30 starting from different initial temperatures when applying fields ranging from 10 to 60 mT and a frequency of 50.33 kHz.

Table S1. Neel and Brown relaxation times at zero field assuming  $K=10^4\text{J/m}^3$ . The values in parentheses correspond to the peak values.

| SAMPLE | $R_{\text{TEM}}$ (nm) | $V_{\text{TEM}}$ ( $\text{m}^3$ )                                   | $\tau_{\text{N}}$ (s)                                               | $R_{\text{DLS}}$ (nm) | $\tau_{\text{B}}$ (s) |
|--------|-----------------------|---------------------------------------------------------------------|---------------------------------------------------------------------|-----------------------|-----------------------|
| MAG-12 | 3-10 (6)              | $10^{-25}$ - $4.2 \cdot 10^{-24}$ ( $9 \cdot 10^{-25}$ )            | $1.3 \cdot 10^{-9}$ - $2 \cdot 10^{-5}$<br>( $2.6 \cdot 10^{-8}$ )  | 60                    | $7 \cdot 10^{-4}$     |
| MAG-30 | 10-25 (16)            | $4 \cdot 10^{-24}$ - $6 \cdot 10^{-23}$ ( $2 \cdot 10^{-23}$ )      | $2 \cdot 10^{-5}$ - $8 \cdot 10^{53}$<br>( $6.7 \cdot 10^8$ )       | 73                    | $10^{-3}$             |
| MAG-50 | 17-35 (26)            | $2 \cdot 10^{-23}$ - $2 \cdot 10^{-22}$<br>( $7.4 \cdot 10^{-23}$ ) | $9.3 \cdot 10^{11}$ - $5 \cdot 10^{200}$<br>( $3.9 \cdot 10^{68}$ ) | 1300                  | <b>10</b>             |
